# Supplementary material for: Nanofluidic proton channels based on a 2D layered glass membrane with improved aqueous and acid stability
Source: Royal Society of Chemistry journal article supplement (doi:10.1039/d2ra03848j), 2022-01-01
Supplement: d2ra03848j1.pdf [file d2ra03848j1.pdf]

**Supporting Information for**  
**Nanofluidic proton channels based on 2D layered glass membrane**  
**with improved aqueous and acid stability**

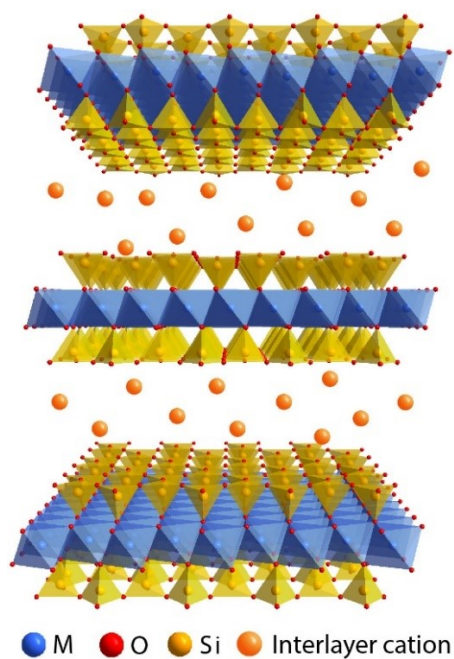

**Figure S1** The sandwich structure of vermiculite. The yellow layers are silicon-oxygen tetrahedron, and the blue layer is magnesium/aluminum-based octahedron. M stands for metal cation impurities such as  $\text{Al}^{3+}$ ,  $\text{Mg}^{2+}$ ,  $\text{Fe}^{3+}$ .

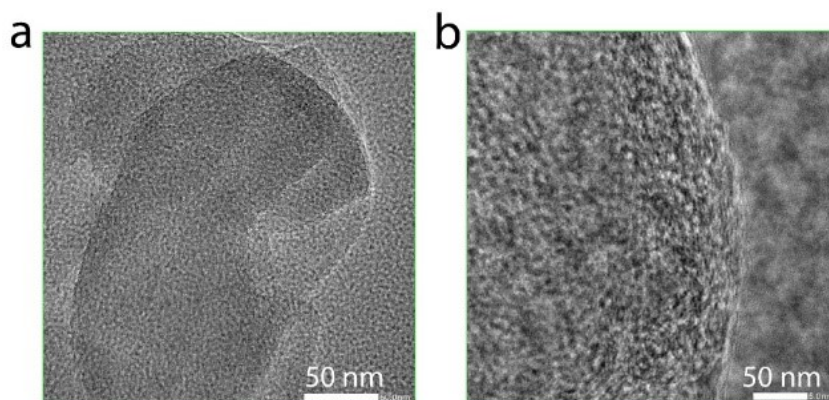

**Figure S2** TEM of 2D silica nanosheets. The 2D silica nanosheets nanosheet has no obvious lattice fringes, indicating that it is amorphous.

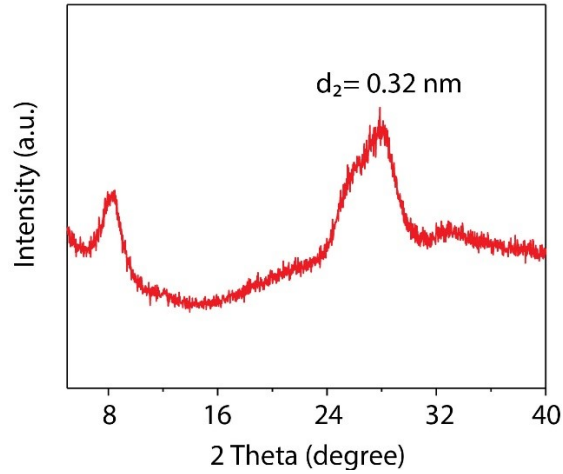

**Figure S3** X-ray diffraction image of LGM. The broad band between  $24^\circ$  to  $30^\circ$  is assigned to amorphous silica. The peak at  $8.2^\circ$  corresponds to the interlayer spacing, and suggests the laminar structure.

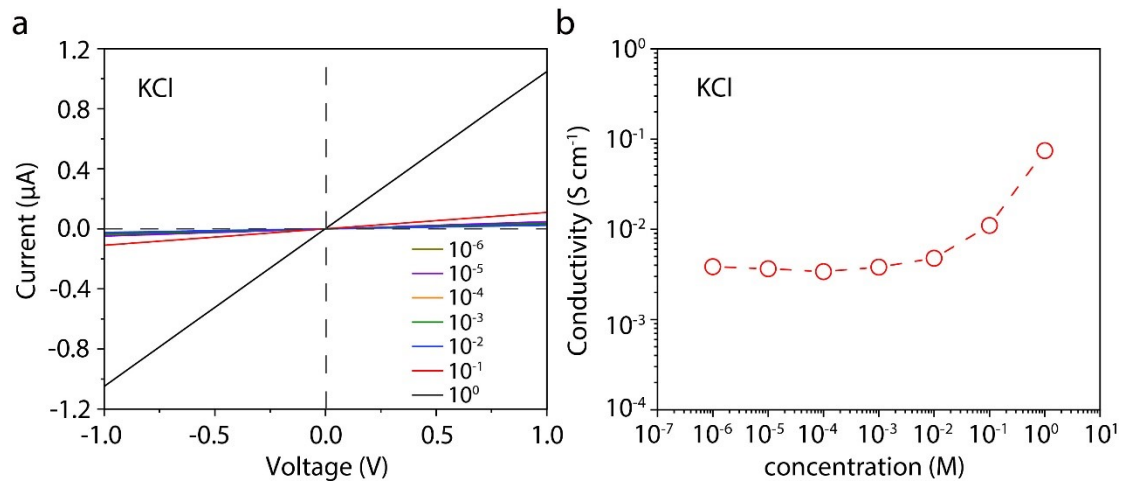

**Figure S4** (a)  $I-V$  characteristic curve under concentrations of KCl solution. (b) The variation of the conductivity of LGM nanochannels under varying concentrations of KCl solution.

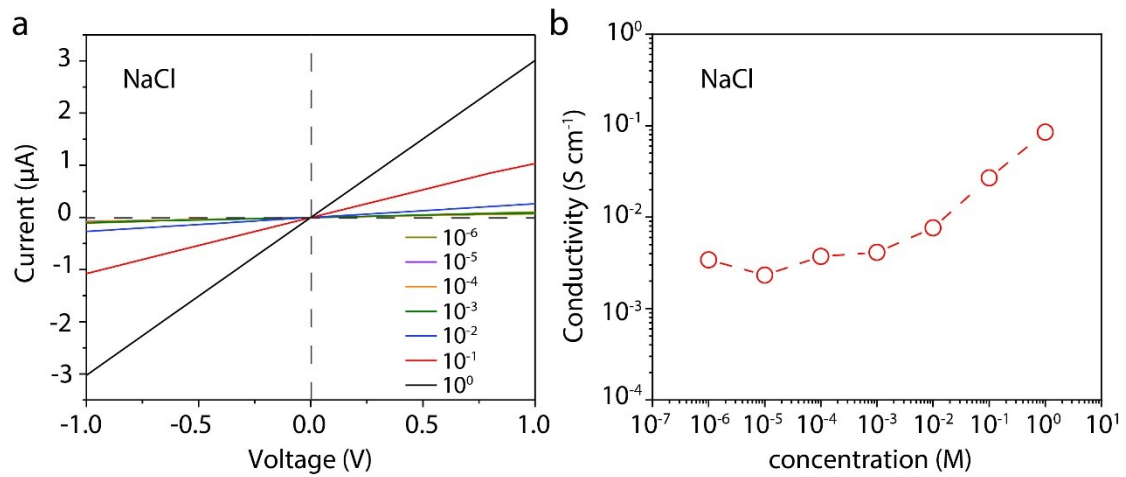

**Figure S5** (a) I-V characteristic curve under concentrations of NaCl solution. (b) The variation of the conductivity of LGM nanochannels under varying concentrations of NaCl solution.

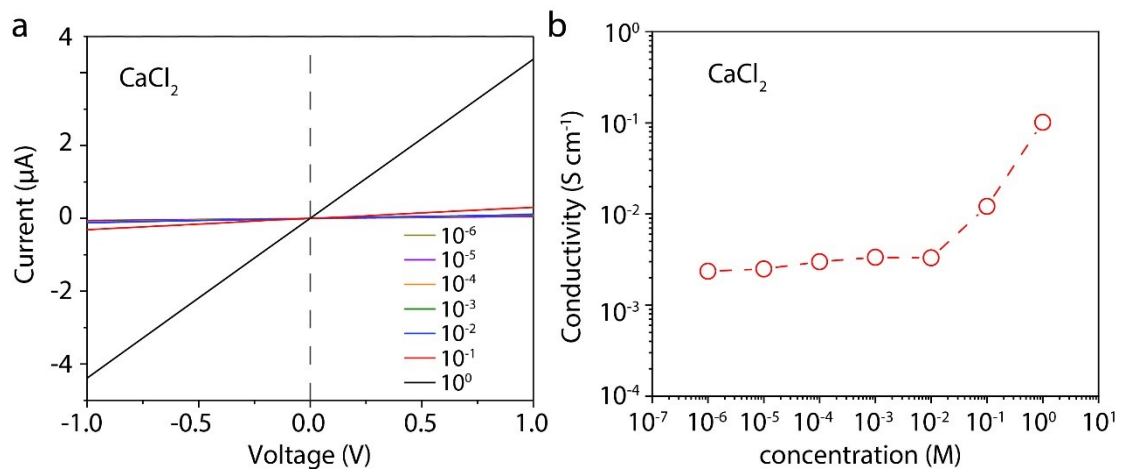

**Figure S6** (a) I-V characteristic curve under concentrations of CaCl<sub>2</sub> solution. (b) The variation of the conductivity of LGM nanochannels under varying concentrations of CaCl<sub>2</sub> solution.

**Table S1** Element composition of layered vermiculite membranes (VM)

| Element | Mass (%) | Atom (%) |
|---------|----------|----------|
| O       | 55.56    | 68.41    |
| Si      | 18.48    | 12.96    |
| Mg      | 13.99    | 11.34    |
| Al      | 8.12     | 5.93     |
| Fe      | 3.85     | 1.36     |
| Total   | 100.00   | 100.00   |
